# Supplementary material
Source: PubMed Central journal article supplement (PMC3440215)
Supplement: supp_pp.112.199067_Thatcher_SupplementalMaterial.pdf [file supp_pp.112.199067_Thatcher_SupplementalMaterial.pdf]

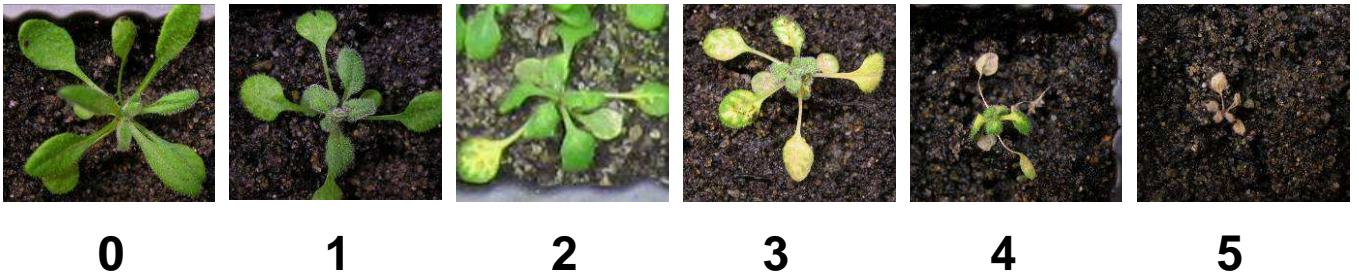

**Supplemental Figure S1. *Fusarium* disease score ratings system.** Following *F. oxysporum* infection, plants were given a disease score rating ranging from 0 to 5. (0) No symptoms, (1) minimal symptoms, 1 leaf chlorotic, (2) >1 leaf chlorotic, minimal necrosis, (3) >50% chlorosis and necrosis, (4) extensive necrosis, stunting, (5) dead.

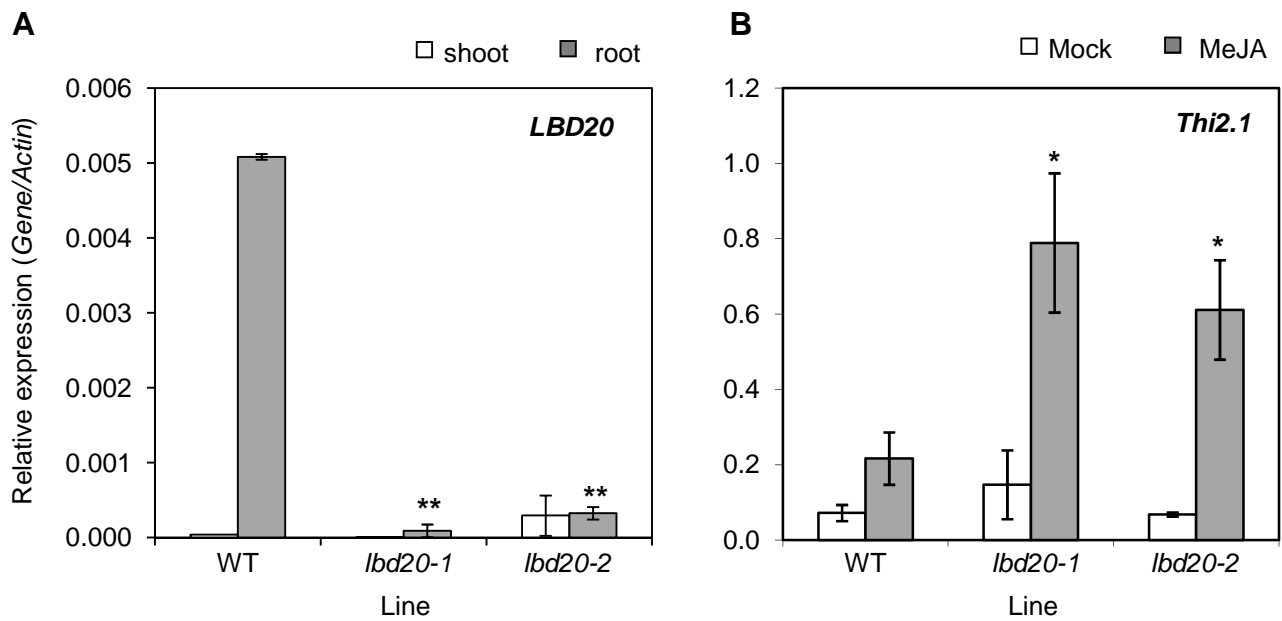

**Supplemental Figure S2. Analysis of *lbd20* T-DNA mutants.** (A) *LBD20* expression was examined in shoot and root tissue of wild-type (WT) and *lbd20* plants. Both *lbd20* alleles had either non-detectable or trace levels of *LBD20*. (B) *Thi2.1* expression was examined in WT and *lbd20* shoot tissue 6 h post mock or MeJA treatment. Gene expression levels are relative to the internal control  $\beta$ -actin genes. The average of three biological replicates consisting of pools of thirty to forty plants is shown with SE. Asterisks indicate values that are significantly different (\*\* $P < 0.01$ , \* $P < 0.05$  Student's *t*-test) from WT in the same tissue or treatment.

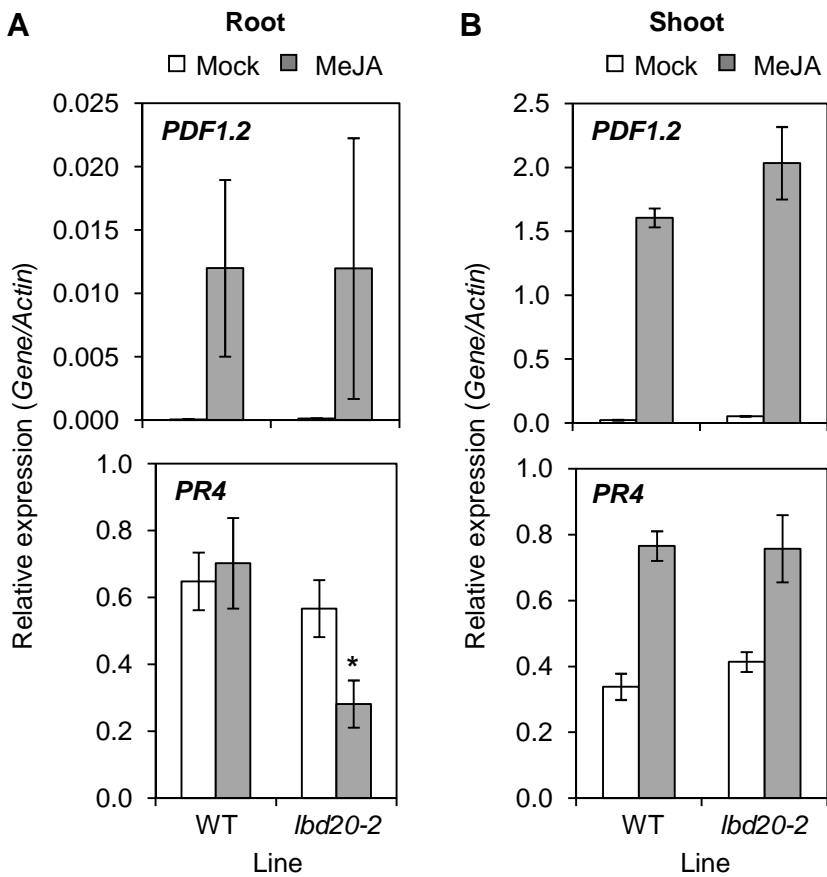

**Supplemental Figure S3. *PDF1.2* and *PR4* expression in wild-type versus *lbd20* plants following MeJA treatment.** Expression of the JA-defense marker genes *PDF1.2* and *PR4* was examined in wild-type (WT) and *lbd20* (A) root or (B) shoot tissue 6 h post mock or MeJA treatment. Gene expression levels are relative to the internal control  $\beta$ -actin genes. The average of three biological replicates consisting of pools of thirty to forty plants is shown with SE. Asterisks indicate values that are significantly different ( $*P < 0.05$  Student's *t*-test) from WT. Similar results were obtained in independent experiments.

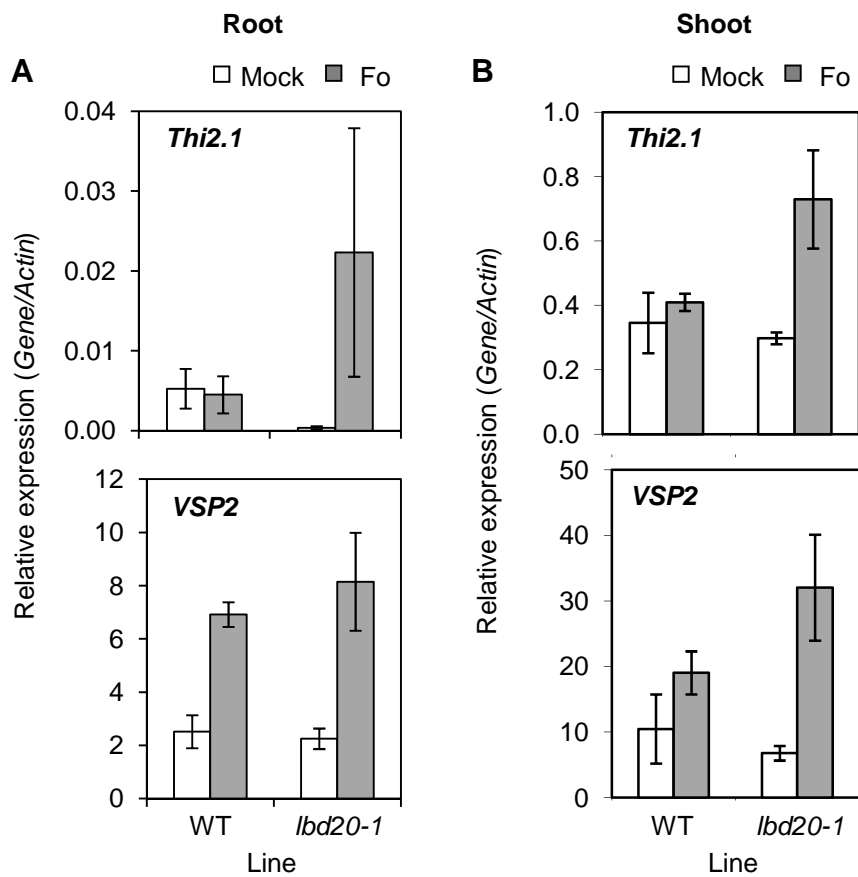

**Supplemental Figure S4. LBD20 is a repressor of a subset of JA-regulated defense genes following *Fusarium* infection.** Expression of JA-response genes was examined in wild-type (WT) and *lbd20* (A) root or (B) shoot 48 h post mock or *F. oxysporum* (Fo) inoculation. Gene expression levels are relative to the internal control  $\beta$ -actin genes. The average of three biological replicates consisting of pools of thirty to forty plants is shown with SE. *PDF1.2* and *PR4* were induced similarly in both WT and *lbd20* shoots (data not shown).

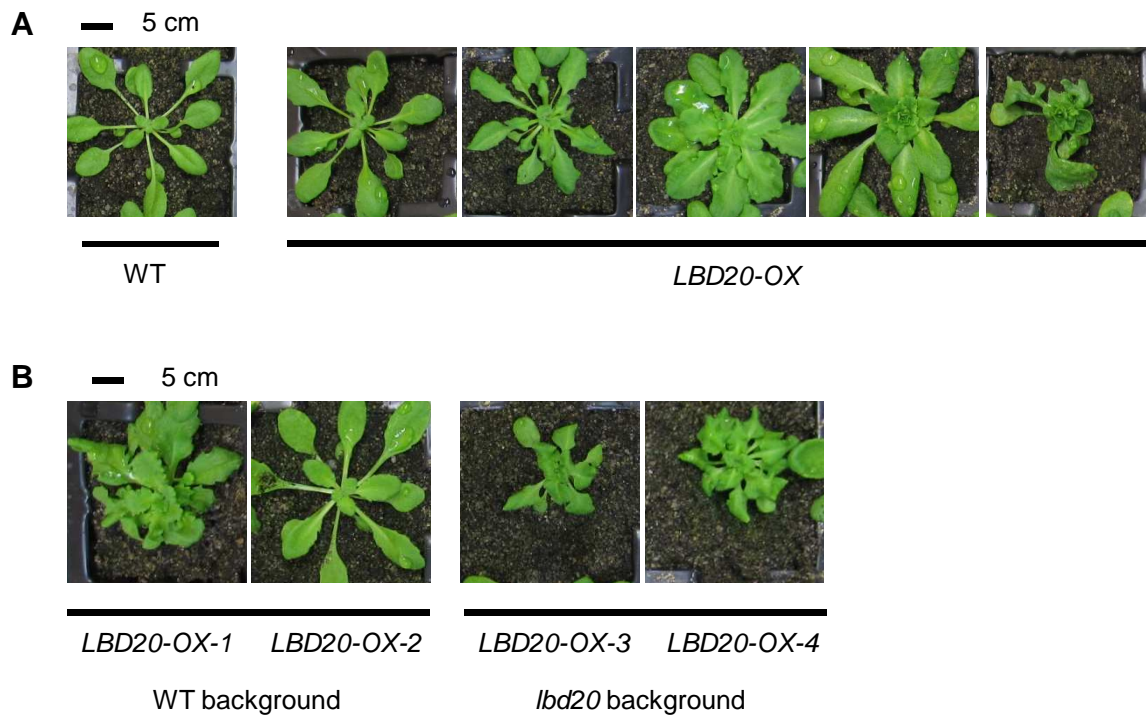

**Supplemental Figure S5. Plants over-expressing *LBD20* have altered leaf morphology and fertility.** (A) Range in severity of phenotypes in T1 plants over-expressing *LBD20* under a dual 35S promoter (*LBD20-OX*) compared to wild-type (WT). 26% of T1 plants died due to deformed growth, and 22% produced little or no seed. (B) Leaf morphology of *LBD20-OX* plants in a wild-type (WT) or *lbd20* background carrying a single copy insertion of the 35S::*LBD20* transgene and used for gene expression and *Fusarium* infection experiments.

**Supplemental Table S1. RT-Q-PCR primers used in gene expression analyses.**

| Gene                                    | Locus<br>(AGI) | Forward primer sequence 5'-3' | Reverse primer sequence 5'-3' |
|-----------------------------------------|----------------|-------------------------------|-------------------------------|
| <i>ACT-8</i><br>(reference)             | At1g49240      |                               | GAGGATAGCATGTGGA ACTGAGAA     |
| <i>ACT-2</i><br>(reference)             | At3g18780      |                               | GATGGCATGGAGGAAGAGAGAAAC      |
| <i>ACT-7</i><br>(reference)             | At5g09810      |                               | GAGGAAGAGCATTCCCCTCGTA        |
| <i>ACT-</i><br>universal<br>(reference) |                | AGTGGTCGTACAACCGGTATTGT       |                               |
| <i>LBD20</i>                            | At3g03760      | GGCTCAAGCTAGGCTCTCTG          | ATTGCACCACCGATAACTCC          |
| <i>PDF1.2</i>                           | At5g44420      | TTTGCTGCTTTGACGCAC            | CGCAAACCCCTGACCATG            |
| <i>Thi2.1</i>                           | At1g72260      | CTCAGCTGATGCTACCAATGAGC       | GCTCCATTACAAATTTCACTTGC       |
| <i>VSP2</i>                             | At5g24770      | CCTAAAGAACGACACCGTCA          | TCGGTCTTCTCTGTTCCGTA          |
| <i>PR4</i>                              | At3g04720      | TGCTACATCCAAATCCAAGCCT        | CGGCAAGTGTTTAAGGGTGAAG        |
| <i>MYC2</i>                             | At1g32640      | TCATACGACGGTTGCCAGAA          | AGCAACGTTTACAAGCTTTGATTG      |
